# Supplementary material for: Methylxanthines Inhibit Primary Amine Oxidase and Monoamine Oxidase Activities of Human Adipose Tissue
Source: Medicines (Basel). 2020 Apr 2;7(4):18. doi: 10.3390/medicines7040018 (PMC7235778; doi:10.3390/medicines7040018)
Supplement: Supplementary file 1 [file medicines-07-00018-s001.pdf]

# Supplementary Materials: Methylxanthines Inhibit Primary Amine Oxidase and Monoamine Oxidase Activities of Human Adipose Tissue

Wiem Haj Ahmed, Cécile Peiro, Jessica Fontaine, Barry J. Ryan, Gemma K. Kinsella, Jeff O'Sullivan, Jean-Louis Grolleau, Gary T.M. Hennehan and Christian Carpéné

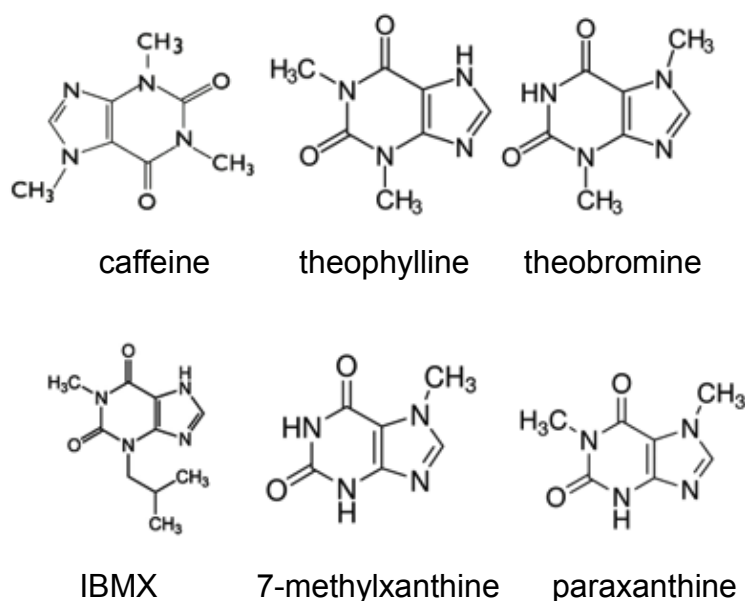

**Figure S1.** Chemical structures of the methylxanthines used in this study. Only 3-isobutyl-1-methylxanthine (IBMX) is not a naturally occurring N-methylated derivative of xanthine.

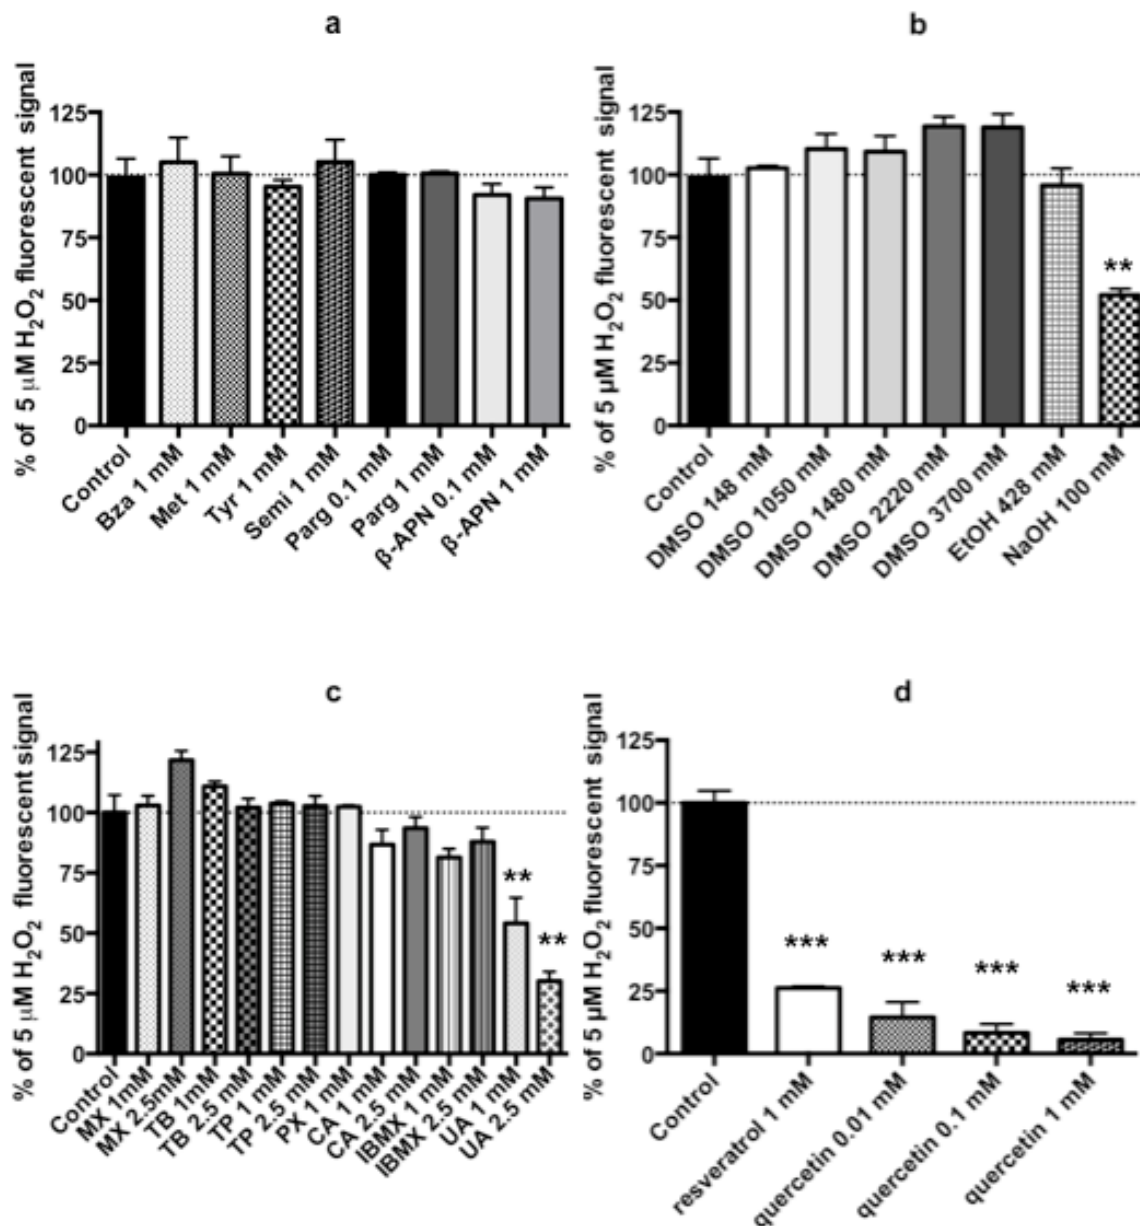

**Figure S2.** Interferences between Amplex Red-based fluorescent detection of hydrogen peroxide and amine oxidase substrates or inhibitors of reference (a); vehicles (b); methylxanthines (c); and polyphenols (d). The fluorescence signal of 5  $\mu\text{M}$   $\text{H}_2\text{O}_2$  was arbitrarily set at 100% in control conditions (dotted line) and was measured in the presence of the indicated final concentrations of the following compounds: a) Bza: benzylamine; Met: methylamine; Tyr: tyramine; Semi: semicarbazide; Parg: pargyline;  $\beta$ -APN:  $\beta$ -aminopropionitrile; b) DMSO: dimethyl sulfoxide; EtOH: ethanol; c) MX: 7-methylxanthine; TB: theobromine; TP: theophylline; PX: paraxanthine; CA: caffeine; IBMX: 3-isobutyl-1-methylxanthine; UA: uric acid; d) resveratrol and quercetin. Each column is mean  $\pm$  SEM of 3–8 determinations. Significantly different from control (black column) at: \*\*  $p < 0.01$ ; \*\*\*  $p < 0.001$ .

(a)

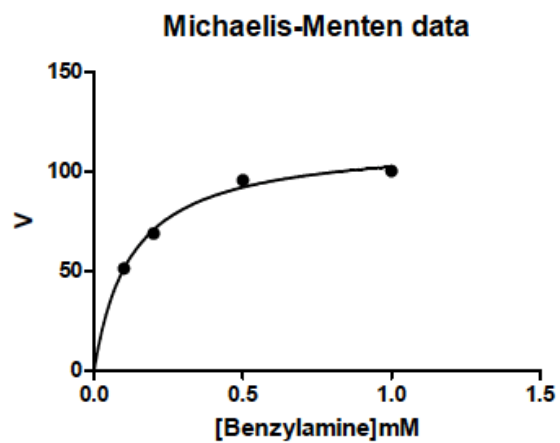

(b)

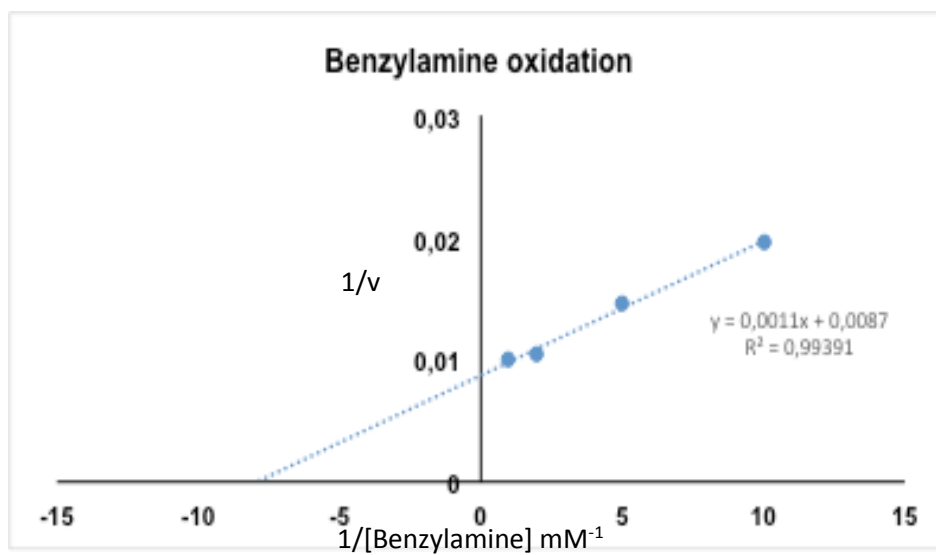

(C)

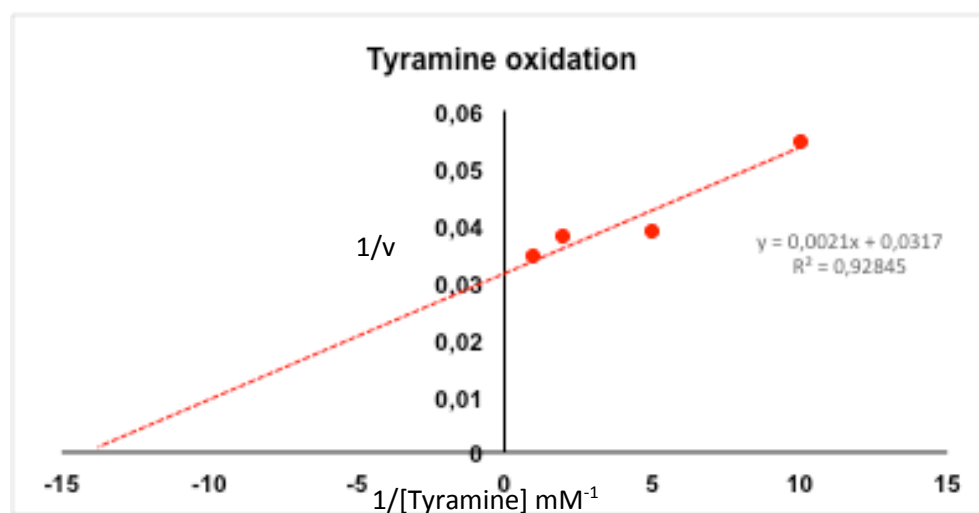

**Figure S3.** Michaelis-Menten data of benzylamine and tyramine oxidation by human adipose tissue homogenates. (a). The velocity of benzylamine oxidation ( $v$ ) was determined for 30 min at final concentrations of: 0.1, 0.2, 0.5 and 1mM and plotted versus benzylamine concentration. Each point is the mean of 8 to 23 determinations. Lineweaver Burk plots with benzylamine (b, blue) or tyramine (c, red) are shown for illustrating the respective  $K_m$  estimations. The  $K_m$  for benzylamine was 126  $\mu$ M and for tyramine it was 66  $\mu$ M. Kinetic constants were estimated by nonlinear regression with the aid of Graph Pad Prism.
